# Supplementary material for: Low-Frequency Earthquakes along the Ryukyu Islands Triggered by Teleseismic Earthquakes
Source: Research Square preprint supplement (doi:10.21203/rs.3.rs-284600/v1), 2021-03-15
Supplement: Supplementary file 1 [file 5cb4a97a63f789b154c6e8f1.xlsx]

## Sheet: Sheet1
Date (UT)	Time (UT)	Latitude	Longitude	Depth (km)	M	PGV at IGK (T)(cm/s)	PGV at IGK (Z)(cm/s)	Median envelope amplitude of noise at IGK (nm/s)	Median envelope amplitude of triggered LFEs at IGK (nm/s)	PGV at ZMM (T)(cm/s)	PGV at ZMM (Z)(cm/s)	Median envelope amplitude of noise at ZMM (nm/s)	Median envelope amplitude of triggered LFEs at ZMM (nm/s)
2004-11-11	21:26:41	-8.152	124.868	10	7.5	0.0107838	0.0201996	2.62903		1.26882	0.0197448	2.24927
2004-12-23	14:59:04	-49.312	161.345	10	8.1	0.0516795	0.0231674	4.21754		4.92835	0.0237753	7.12057
2004-12-26	00:58:53	3.295	95.982	30	9.1	0.363534	0.437508	5.94073	42.3	23.8775	0.400463	11.8048	30
2005-03-28	16:09:36	2.085	97.108	30	8.6	0.0968601	0.104021	4.03228	5.85	10.4948	0.0955765	5.51218	7.13
2005-09-09	07:26:43	-4.539	153.474	90	7.6	0.0039229	0.00418655	7.39288		0.180133	0.00342812	5.74323
2005-10-08	03:50:40	34.539	73.588	26	7.6	0.0919681	0.0285568	8.05977		5.24893	0.0310566	4.98709
2006-04-20	23:25:02	60.949	167.089	22	7.6	0.0312031	0.0351329	3.8354		2.55961	0.0319563	6.46815
2006-05-03	15:26:40	-20.187	-174.123	55	8	0.0175292	0.0148118	1.99323		1.98504	0.0193791	4.14808
2006-07-17	08:19:26	-9.284	107.419	20	7.7	0.00667294	0.00975034	5.44645		0.352512	0.00986015	4.92386
2006-11-15	11:14:13	46.592	153.266	10	8.3	0.0414099	0.0571228	4.91487		4.36809	0.0374611	9.13976
2007-01-13	04:23:21	46.243	154.524	10	8.1	0.056982	0.0669294	22.6137		5.18565	0.0688016	13.1705
2007-01-21	11:27:45	1.065	126.282	22	7.5	0.0275462	0.033236	5.22698		2.22016	0.0168231	16.3913
2007-04-01	20:39:58	-8.466	157.043	24	8.1	0.0341475	0.0478685	4.18724		2.6841	0.0461725	5.14404
2007-09-12	11:10:26	-4.438	101.367	34	8.5	0.0257573	0.0375971	6.8046		3.66601	0.0717695	11.2374
2008-05-12	06:28:01	31.002	103.322	19	7.9	0.504631	0.264627	6.59367	30.9	31.1119	0.52626	14.131	36.4
2009-01-03	19:43:50	-0.414	132.885	17	7.7	0.0483093	0.0214849	2.79859		3.75698	0.0254676	5.52056
2009-03-19	18:17:40	-23.043	-174.66	31	7.6	0.0112581	0.014298	4.35736		1.17621	0.0111965	5.08503
2009-07-15	09:22:29	-45.762	166.562	12	7.8	0.0284898	0.0078646	3.38597		3.77121	0.0109847	4.6895
2009-08-10	19:55:38	14.099	92.902	24	7.5	0.0257313	0.0142112	4.76021		2.43935	0.0252882	6.09963
2009-09-29	17:48:10	-15.489	-172.095	18	8.1	0.0116789	0.0257026	4.493		1.44667	0.0230516	6.66211
2009-09-30	10:16:09	-0.72	99.867	81	7.6	0.0103446	0.0221511	5.36722		1.34198	0.0197613	7.50569
2009-10-07	22:03:14	-13.006	166.51	45	7.7	0.0269162	0.0365909	25.8741		2.96649	0.0542405	39.8279
2010-04-06	22:15:01	2.383	97.048	31	7.8	0.019183	0.0395163	6.80607		1.43622	0.0292635	8.81758
2010-06-12	19:26:50	7.881	91.936	35	7.5	0.0267779	0.0258321	1.40147		2.60521	0.0249992	5.48412
2010-10-25	14:42:22	-3.487	100.082	20.1	7.8	0.0085647	0.00868722	6.14756		0.563123	0.00956231	9.60215
2011-03-11	05:46:24	38.297	142.373	29	9	0.596921	0.533767	4.58456		69.0081	0.603533	5.72797
2011-03-11	06:15:40	36.281	141.111	42.6	7.9	0.197564	0.104371	233.223		21.3431	0.158179	90.4492
2011-03-11	06:25:50	38.058	144.59	18.6	7.7	0.0711417	0.069731	93.7106		5.15495	0.0737392	78.4442
2011-07-06	19:03:18	-29.539	-176.34	17	7.6	0.00523124	0.00577517	2.5667		1.26569	0.013011	6.00314
2012-04-11	08:38:36	2.327	93.063	20	8.6	0.220046	0.180457	4.39193	11.4	11.6481	0.176011	5.88298	20.5
2012-04-11	10:43:10	0.802	92.463	25.1	8.2	0.100267	0.0706646	3.00749		7.84426	0.070112	5.55583
2012-08-31	12:47:33	10.811	126.638	28	7.6	0.0459287	0.0483404	2.8671		3.63506	0.0843266	5.23876
2012-10-28	03:04:08	52.788	-132.101	14	7.8	0.0108682	0.00552875	4.88769		1.14744	0.00521375	5.62494
2013-01-05	08:58:19	55.393	-134.652	10	7.5	0.0137243	0.0140337	4.00993		0.924905	0.00769768	7.95338
2013-02-06	01:12:25	-10.799	165.114	24	8	0.00699983	0.01002	6.16019		0.771847	0.00425538	9.06683
2013-04-16	10:44:20	28.033	61.996	80	7.7	0.01841	0.013363	2.44063		1.09	0.00597456	3.89423
2013-09-24	11:29:47	26.951	65.501	15	7.7	0.0384063	0.0230982	3.67882		3.54883	0.010618	7.4482
2014-04-12	20:14:39	-11.27	162.148	22.6	7.6	0.0321267	0.0271023	3.65949		4.03	0.02746	6.347
2014-04-19	13:28:00	-6.755	155.024	43.4	7.5	0.0192287	0.0282407	2.24191		1.01583	0.0256478	2.85277
2014-06-23	20:53:09	51.849	178.735	109	7.9	0.0216909	0.0189983	2.8743		2.42447	0.0295741	5.1689
2015-03-29	23:48:31	-4.729	152.562	41	7.5	0.0184815	0.0114233	5.72403		1.62502	0.0113158	3.42046
2015-04-25	06:11:25	28.23	84.731	8.2	7.8	0.130161	0.129646	4.94113	21.8	20.7386	0.269092	6.11281	10.8
2015-05-05	01:44:06	-5.462	151.875	55	7.5	0.0108251	0.00802498	4.72089		0.930172	0.00909193	6.94279
2015-10-26	09:09:42	36.524	70.368	231	7.5	0.0165162	0.010423	2.9576		0.903292	0.00780511	4.86291
2016-03-02	12:49:48	-4.952	94.33	24	7.8	0.0177903	0.0148199	4.40723		1.68996	0.0246417	3.73177
